# Supplementary material
Source: MDPI journal article supplement (https://www.mdpi.com/2073-4441/8/5/177)
Supplement: s1 [file s1]

# Supplementary Materials: Multi-Basin Modelling of Future Hydrological Fluxes in the Indian Subcontinent

Ilias G. Pechlivanidis, Jonas Olsson, Thomas Bosshard, Devesh Sharma and K. C. Sharma

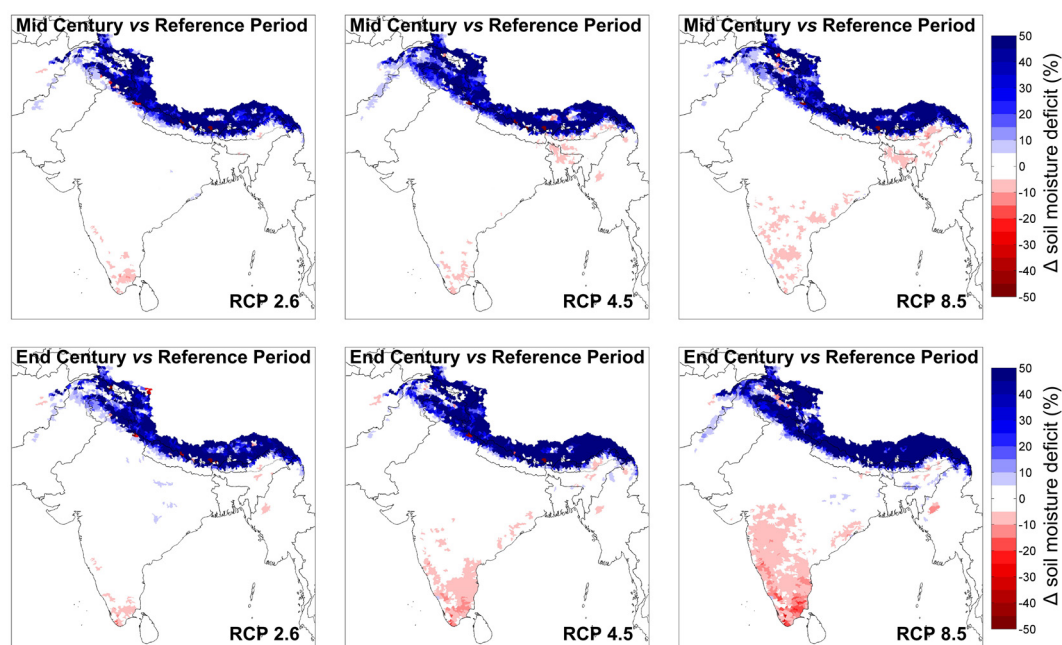

**Figure S1.** Relative change in soil moisture deficit (SMD) for each climate projection (columns 1–3) and period (top and bottom row for mid- and end-century respectively).

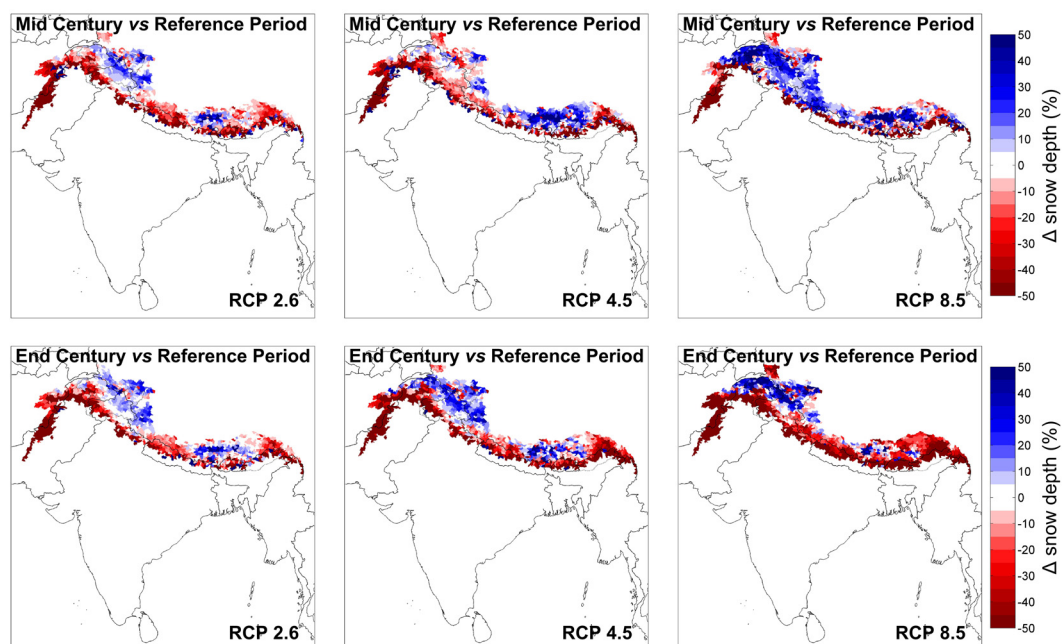

**Figure S2.** Relative change in snow depth (SD) for each climate projection (columns 1–3) and period (top and bottom row for mid- and end-century, respectively).
